# Supplementary material
Source: Copernicus journal article supplement (doi:10.5194/bg-23-3591-2026)
Supplement: Supplementary file 1 [file bg-23-3591-2026-supplement.pdf]

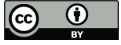

*Supplement of*

## **Factors controlling dissolved $^{137}\text{Cs}$ activities in Matsukawa-ura lagoon, a semi-closed estuary, after the Fukushima accident**

**Takuya Niida et al.**

*Correspondence to:* Takuya Niida (niida\_takuya@kanso.co.jp)

The copyright of individual parts of the supplement might differ from the article licence.

Table S1

## Catchment mean rainfall and flux of river water discharge.

|                                                            | Weather station                                                                                                  |        | Catchment |        |       |          | Total  | Groundwater |        |
|------------------------------------------------------------|------------------------------------------------------------------------------------------------------------------|--------|-----------|--------|-------|----------|--------|-------------|--------|
|                                                            | Hippo                                                                                                            | Soma   | Koizumi   | Uda    | Ume   | Nikkeshi |        |             |        |
| Catchment area (km <sup>2</sup> )                          |                                                                                                                  |        | 17.8      | 100.6  | 10.7  | 22.6     | 151.6  |             |        |
| Land use (%)                                               | Forest                                                                                                           |        | 51        | 85     | 27    | 62       |        |             |        |
|                                                            | Paddy field                                                                                                      |        | 18        | 5      | 41    | 22       |        |             |        |
|                                                            | Farmland                                                                                                         |        | 6         | 6      | 6     | 4        |        |             |        |
|                                                            | Urban area                                                                                                       |        | 22        | 1      | 20    | 3        |        |             |        |
| Ratio to entire catchment (%)                              | Koizumi river (KZ)                                                                                               | 0      | 100       |        |       |          |        |             |        |
|                                                            | Uda river (UD)                                                                                                   | 60     | 40        |        |       |          |        |             |        |
|                                                            | Ume river (UM)                                                                                                   | 0      | 100       |        |       |          |        |             |        |
|                                                            | Nikkeshi river (NK)                                                                                              | 0      | 100       |        |       |          |        |             |        |
| Rainfall in the 30 days<br>prior to sample collection (mm) | Jun-21                                                                                                           | 91     | 74        | 74     | 84    | 74       | 74     |             |        |
|                                                            | Jul-21                                                                                                           | 165    | 197       | 197    | 177   | 197      | 197    |             |        |
|                                                            | Aug-21                                                                                                           | 346    | 321       | 321    | 336   | 321      | 321    |             |        |
|                                                            | Sep-21                                                                                                           | 211    | 195       | 195    | 204   | 195      | 195    |             |        |
|                                                            | Oct-21                                                                                                           | 181    | 177       | 177    | 179   | 177      | 177    |             |        |
|                                                            | Dec-21                                                                                                           | 117    | 64        | 64     | 96    | 64       | 64     |             |        |
|                                                            | Feb-22                                                                                                           | 21     | 12        | 12     | 17    | 12       | 12     |             |        |
|                                                            | Jun-22                                                                                                           | 217    | 235       | 235    | 224   | 235      | 235    |             |        |
|                                                            | Aug-22                                                                                                           | 141    | 99        | 99     | 124   | 99       | 99     |             |        |
|                                                            | Oct-22                                                                                                           | 54     | 97        | 97     | 71    | 97       | 97     |             |        |
|                                                            | Feb-23                                                                                                           | 47     | 28        | 28     | 39    | 28       | 28     |             |        |
|                                                            | Flux of river water and<br>groundwater discharge<br>( $\times 10^6 \text{ m}^3 \text{ 12 h}^{-1}$ ) <sup>a</sup> | Jun-21 |           |        | 0.011 | 0.073    | 0.0068 | 0.014       | 0.11   |
| Jul-21                                                     |                                                                                                                  |        |           | 0.030  | 0.15  | 0.018    | 0.039  | 0.24        | 0.018  |
| Aug-21                                                     |                                                                                                                  |        |           | 0.050  | 0.29  | 0.030    | 0.063  | 0.44        | 0.033  |
| Sep-21                                                     |                                                                                                                  |        |           | 0.030  | 0.18  | 0.018    | 0.038  | 0.26        | 0.020  |
| Oct-21                                                     |                                                                                                                  |        |           | 0.027  | 0.16  | 0.016    | 0.035  | 0.23        | 0.018  |
| Dec-21                                                     |                                                                                                                  |        |           | 0.010  | 0.083 | 0.0059   | 0.013  | 0.11        | 0.0084 |
| Feb-22                                                     |                                                                                                                  |        |           | 0.0019 | 0.015 | 0.0011   | 0.0024 | 0.020       | 0.0015 |
| Jun-22                                                     |                                                                                                                  |        |           | 0.036  | 0.20  | 0.022    | 0.046  | 0.30        | 0.022  |
| Aug-22                                                     |                                                                                                                  |        |           | 0.015  | 0.11  | 0.0092   | 0.019  | 0.15        | 0.011  |
| Oct-22                                                     |                                                                                                                  |        |           | 0.015  | 0.062 | 0.0090   | 0.019  | 0.10        | 0.0078 |
| Feb-23                                                     |                                                                                                                  |        |           | 0.0043 | 0.034 | 0.0026   | 0.0055 | 0.047       | 0.0035 |

<sup>a</sup> Based on the data from Kamo et al.(2014).

**Table S2**Analytical results of  $^{137}\text{Cs}$  concentration at river inflowing to Matsukawa-ura lagoon. $^{137}\text{Cs}$  activity concentrations were decay-corrected to the sampling date.

| Station    | Sampling date | Long E    | Lat N      | Salinity   | $^{137}\text{Cs}$ in suspended particles (Bq kg <sup>-1</sup> ) | Particulate $^{137}\text{Cs}$ (Bq m <sup>-3</sup> ) | Dissolved $^{137}\text{Cs}$ (Bq m <sup>-3</sup> ) | Suspended particle concentration (Bq m <sup>-3</sup> ) | Apparent distribution coefficient (L kg <sup>-1</sup> ) |           |      |        |
|------------|---------------|-----------|------------|------------|-----------------------------------------------------------------|-----------------------------------------------------|---------------------------------------------------|--------------------------------------------------------|---------------------------------------------------------|-----------|------|--------|
| KZ         | 2021/6/17     | 140.9272  | 37.8076    | 0.1        | 1128 ± 87                                                       | 4.5 ± 0.3                                           | 3.5 ± 0.2                                         | 4.0                                                    | 321075                                                  |           |      |        |
|            | 2021/7/20     |           |            | 0.2        | 3677 ± 221                                                      | 6.0 ± 0.4                                           | 2.7 ± 0.3                                         | 1.6                                                    | 1343027                                                 |           |      |        |
|            | 2021/8/27     |           |            | 0.1        | 4835 ± 854                                                      | 1.8 ± 0.3                                           | 3.7 ± 0.3                                         | 0.4                                                    | 1290839                                                 |           |      |        |
|            | 2021/9/24     |           |            | 0.1        | 1419 ± 68                                                       | 6.5 ± 0.3                                           | 2.2 ± 0.3                                         | 4.6                                                    | 641397                                                  |           |      |        |
|            | 2021/10/28    |           |            | 0.1        | 2368 ± 196                                                      | 3.6 ± 0.3                                           | 1.2 ± 0.3                                         | 1.5                                                    | 1976150                                                 |           |      |        |
|            | 2021/12/24    |           |            | 0.4        | 1833 ± 115                                                      | 4.8 ± 0.3                                           | 2.6 ± 0.3                                         | 2.6                                                    | 712516                                                  |           |      |        |
|            | 2022/2/8      |           |            | 1.0        | 191 ± 34                                                        | 0.5 ± 0.1                                           | 2.7 ± 0.3                                         | 2.4                                                    | 71815                                                   |           |      |        |
|            | 2022/6/23     |           |            | 0.1        | 386 ± 65                                                        | 1.4 ± 0.2                                           | 1.0 ± 0.3                                         | 3.7                                                    | 391027                                                  |           |      |        |
|            | 2022/8/30     |           |            | 0.1        | 955 ± 19                                                        | 47.0 ± 0.9                                          | 1.8 ± 0.3                                         | 49.2                                                   | 531742                                                  |           |      |        |
|            | 2022/10/27    |           |            | 0.1        | 776 ± 144                                                       | 1.1 ± 0.2                                           | 1.2 ± 0.3                                         | 1.5                                                    | 669661                                                  |           |      |        |
|            | 2023/2/20     |           |            | 0.1        | 653 ± 119                                                       | 1.7 ± 0.3                                           | 2.1 ± 0.3                                         | 2.5                                                    | 314126                                                  |           |      |        |
|            | UD            |           |            | 2021/6/17  | 140.9126                                                        | 37.7902                                             | 0.1                                               | 1110 ± 163                                             | 1.9 ± 0.3                                               | 2.0 ± 0.3 | 1.8  | 551470 |
|            |               |           |            | 2021/7/20  |                                                                 |                                                     | 0.1                                               | 1790 ± 447                                             | 1.1 ± 0.3                                               | 2.3 ± 0.2 | 0.6  | 777173 |
| 2021/8/27  |               | 0.1       | 2368 ± 272 | 2.4 ± 0.3  |                                                                 |                                                     | 2.5 ± 0.3                                         | 1.0                                                    | 965710                                                  |           |      |        |
| 2021/9/24  |               | 0.1       | 988 ± 149  | 2.0 ± 0.3  |                                                                 |                                                     | 1.8 ± 0.2                                         | 2.0                                                    | 550703                                                  |           |      |        |
| 2021/10/28 |               | 0.1       | 1435 ± 91  | 5.1 ± 0.3  |                                                                 |                                                     | 1.3 ± 0.3                                         | 3.6                                                    | 1110440                                                 |           |      |        |
| 2021/12/24 |               | 0.1       | 4452 ± 352 | 3.1 ± 0.2  |                                                                 |                                                     | 1.8 ± 0.3                                         | 0.7                                                    | 2419522                                                 |           |      |        |
| 2022/2/8   |               | 0.1       | 3750 ± 327 | 2.9 ± 0.3  |                                                                 |                                                     | 1.0 ± 0.2                                         | 0.8                                                    | 3698272                                                 |           |      |        |
| 2022/6/23  |               | 0.1       | 376 ± 122  | 0.4 ± 0.1  |                                                                 |                                                     | 2.2 ± 0.3                                         | 1.1                                                    | 167708                                                  |           |      |        |
| 2022/8/30  |               | 0.1       | 670 ± 15   | 45.7 ± 1.0 |                                                                 |                                                     | 1.0 ± 0.2                                         | 68.2                                                   | 648187                                                  |           |      |        |
| 2022/10/27 |               | 0.1       | 1308 ± 211 | 0.7 ± 0.1  |                                                                 |                                                     | 1.3 ± 0.3                                         | 0.5                                                    | 1016381                                                 |           |      |        |
| 2023/2/20  |               | 0.1       | 2331 ± 541 | 1.2 ± 0.3  |                                                                 |                                                     | 1.3 ± 0.3                                         | 0.5                                                    | 1813976                                                 |           |      |        |
| UM         |               | 2021/6/17 | 140.9494   | 37.7863    |                                                                 |                                                     | 0.1                                               | 1496 ± 30                                              | 45.6 ± 0.9                                              | 3.4 ± 0.2 | 30.5 | 434323 |
|            |               | 2021/7/20 |            |            |                                                                 |                                                     | 0.1                                               | 2331 ± 51                                              | 37.6 ± 0.8                                              | 2.3 ± 0.2 | 16.1 | 992628 |
|            | 2021/8/27     | 0.1       |            |            | 9140 ± 384                                                      | 13.7 ± 0.6                                          | 3.0 ± 0.3                                         | 1.5                                                    | 3024999                                                 |           |      |        |
|            | 2021/9/24     | 0.1       |            |            | 974 ± 29                                                        | 15.8 ± 0.5                                          | 3.4 ± 0.4                                         | 16.2                                                   | 285496                                                  |           |      |        |
|            | 2021/10/28    | 0.1       |            |            | 1034 ± 28                                                       | 15.8 ± 0.4                                          | 2.3 ± 0.3                                         | 15.3                                                   | 444498                                                  |           |      |        |
|            | 2021/12/24    | 0.1       |            |            | 1244 ± 53                                                       | 8.7 ± 0.4                                           | 3.3 ± 0.3                                         | 7.0                                                    | 379072                                                  |           |      |        |
|            | 2022/2/8      | 0.1       |            |            | 789 ± 36                                                        | 7.3 ± 0.3                                           | 3.0 ± 0.3                                         | 9.2                                                    | 264015                                                  |           |      |        |
|            | 2022/6/23     | 0.1       |            |            | 1346 ± 24                                                       | 33.2 ± 0.6                                          | 2.4 ± 0.3                                         | 24.7                                                   | 554292                                                  |           |      |        |
|            | 2022/8/30     | 0.1       |            |            | 2707 ± 49                                                       | 54.1 ± 1.0                                          | 1.7 ± 0.3                                         | 20.0                                                   | 1630890                                                 |           |      |        |
|            | 2022/10/27    | 0.1       |            |            | 1014 ± 60                                                       | 5.6 ± 0.3                                           | 2.6 ± 0.3                                         | 5.5                                                    | 394389                                                  |           |      |        |
|            | 2023/2/20     | 0.2       |            |            | 454 ± 28                                                        | 5.5 ± 0.3                                           | 1.6 ± 0.3                                         | 12.1                                                   | 287519                                                  |           |      |        |
|            | NK            | 2021/6/17 |            |            | 140.9428                                                        | 37.7594                                             | 0.1                                               | 1360 ± 65                                              | 10.0 ± 0.5                                              | 3.9 ± 0.2 | 7.3  | 349932 |
|            |               | 2021/7/20 |            |            |                                                                 |                                                     | 0.1                                               | 560 ± 88                                               | 1.5 ± 0.2                                               | 3.3 ± 0.2 | 2.8  | 171579 |
| 2021/8/27  |               | 0.1       | 1861 ± 210 | 3.3 ± 0.4  |                                                                 |                                                     | 3.8 ± 0.3                                         | 1.8                                                    | 490207                                                  |           |      |        |
| 2021/9/24  |               | 0.1       | 2176 ± 74  | 15.3 ± 0.5 |                                                                 |                                                     | 3.2 ± 0.3                                         | 7.1                                                    | 690292                                                  |           |      |        |
| 2021/10/28 |               | 0.1       | 2224 ± 80  | 12.0 ± 0.4 |                                                                 |                                                     | 3.2 ± 0.3                                         | 5.4                                                    | 701280                                                  |           |      |        |
| 2021/12/24 |               | 0.1       | 373 ± 51   | 2.1 ± 0.3  |                                                                 |                                                     | 3.9 ± 0.4                                         | 5.6                                                    | 95406                                                   |           |      |        |
| 2022/2/8   |               | 0.1       | 360 ± 65   | 1.5 ± 0.3  |                                                                 |                                                     | 3.5 ± 0.3                                         | 4.1                                                    | 102398                                                  |           |      |        |
| 2022/6/23  |               | 0.1       | 1208 ± 146 | 2.3 ± 0.3  |                                                                 |                                                     | 2.4 ± 0.3                                         | 1.9                                                    | 513555                                                  |           |      |        |
| 2022/8/30  |               | 0.1       | 1702 ± 32  | 55.8 ± 1.0 |                                                                 |                                                     | 4.0 ± 0.4                                         | 32.8                                                   | 425506                                                  |           |      |        |
| 2022/10/27 |               | 0.1       | 1039 ± 75  | 3.7 ± 0.3  |                                                                 |                                                     | 4.0 ± 0.4                                         | 3.6                                                    | 258130                                                  |           |      |        |
| 2023/2/20  |               | 0.1       | 595 ± 31   | 6.0 ± 0.3  |                                                                 |                                                     | 3.5 ± 0.3                                         | 10.1                                                   | 168108                                                  |           |      |        |

**Table S3**

Analytical results of  $^{137}\text{Cs}$  activity concentration in surface water collected at station UME, OSS, IWS and UDE in Matsukawa-ura lagoon.  $^{137}\text{Cs}$  activity concentrations were decay-corrected to the sampling date.

| Station    | Sampling date | Long E    | Lat N      | Salinity   | $^{137}\text{Cs}$ in suspended particles (Bq kg <sup>-1</sup> ) | Particulate $^{137}\text{Cs}$ (Bq m <sup>-3</sup> ) | Dissolved $^{137}\text{Cs}$ (Bq m <sup>-3</sup> ) | Suspended particle concentration (Bq m <sup>-3</sup> ) | Apparent distribution coefficient (L kg <sup>-1</sup> ) |            |      |        |
|------------|---------------|-----------|------------|------------|-----------------------------------------------------------------|-----------------------------------------------------|---------------------------------------------------|--------------------------------------------------------|---------------------------------------------------------|------------|------|--------|
| UME        | 2021/6/17     | 140.9698  | 37.7869    | 6.0        | 730 ± 14                                                        | 103.3 ± 2.0                                         | 23.5 ± 0.4                                        | 141.5                                                  | 31057                                                   |            |      |        |
|            | 2021/7/20     |           |            | 26.8       | 489 ± 16                                                        | 18.0 ± 0.6                                          | 31.3 ± 0.7                                        | 36.8                                                   | 15602                                                   |            |      |        |
|            | 2021/8/27     |           |            | 28.3       | 16433 ± 770                                                     | 12.3 ± 0.6                                          | 18.0 ± 0.5                                        | 0.7                                                    | 914863                                                  |            |      |        |
|            | 2021/9/24     |           |            | 28.7       | 594 ± 7                                                         | 123.3 ± 1.4                                         | 24.6 ± 0.8                                        | 207.6                                                  | 24181                                                   |            |      |        |
|            | 2021/10/28    |           |            | 26.7       | 853 ± 26                                                        | 13.2 ± 0.4                                          | 14.4 ± 0.6                                        | 15.5                                                   | 59062                                                   |            |      |        |
|            | 2021/12/24    |           |            | 23.3       | 2005 ± 108                                                      | 5.6 ± 0.3                                           | 7.2 ± 0.5                                         | 2.8                                                    | 278607                                                  |            |      |        |
|            | 2022/2/8      |           |            | 31.0       | 779 ± 34                                                        | 7.2 ± 0.3                                           | 9.0 ± 0.4                                         | 9.2                                                    | 86841                                                   |            |      |        |
|            | 2022/6/23     |           |            | 28.4       | 1001 ± 34                                                       | 12.7 ± 0.4                                          | 25.1 ± 0.8                                        | 12.7                                                   | 39801                                                   |            |      |        |
|            | 2022/8/30     |           |            | 15.6       | 1369 ± 19                                                       | 121.9 ± 1.7                                         | 14.4 ± 0.6                                        | 89.0                                                   | 94935                                                   |            |      |        |
|            | 2022/10/27    |           |            | 32.0       | 1509 ± 30                                                       | 28.2 ± 0.6                                          | 17.7 ± 0.6                                        | 18.7                                                   | 85289                                                   |            |      |        |
|            | 2023/2/20     |           |            | 32.5       | 570 ± 31                                                        | 7.3 ± 0.4                                           | 8.3 ± 0.5                                         | 12.8                                                   | 68412                                                   |            |      |        |
|            | OSS           |           |            | 2021/6/17  | 140.9792                                                        | 37.7967                                             | 30.9                                              | 751 ± 26                                               | 13.6 ± 0.5                                              | 21.0 ± 0.4 | 18.2 | 35753  |
|            |               |           |            | 2021/7/20  |                                                                 |                                                     | 28.8                                              | 1708 ± 85                                              | 7.6 ± 0.4                                               | 24.0 ± 0.6 | 4.4  | 71195  |
| 2021/8/27  |               | 26.1      | 1482 ± 141 | 2.8 ± 0.3  |                                                                 |                                                     | 12.5 ± 0.4                                        | 1.9                                                    | 118460                                                  |            |      |        |
| 2021/9/24  |               | 28.7      | 1162 ± 35  | 16.4 ± 0.5 |                                                                 |                                                     | 14.0 ± 0.6                                        | 14.1                                                   | 83068                                                   |            |      |        |
| 2021/10/28 |               | 26.8      | 1224 ± 147 | 2.2 ± 0.3  |                                                                 |                                                     | 8.9 ± 0.5                                         | 1.8                                                    | 137625                                                  |            |      |        |
| 2021/12/24 |               | 29.7      | 447 ± 105  | 0.9 ± 0.2  |                                                                 |                                                     | 5.2 ± 0.4                                         | 1.9                                                    | 85873                                                   |            |      |        |
| 2022/2/8   |               | 31.7      | 232 ± 36   | 1.4 ± 0.2  |                                                                 |                                                     | 6.4 ± 0.4                                         | 6.1                                                    | 36525                                                   |            |      |        |
| 2022/6/23  |               | 30.1      | 869 ± 68   | 4.0 ± 0.3  |                                                                 |                                                     | 17.2 ± 0.6                                        | 4.6                                                    | 50544                                                   |            |      |        |
| 2022/8/30  |               | 9.7       | 503 ± 21   | 15.8 ± 0.7 |                                                                 |                                                     | 9.7 ± 0.5                                         | 31.4                                                   | 51996                                                   |            |      |        |
| 2022/10/27 |               | 32.6      | 632 ± 68   | 2.5 ± 0.3  |                                                                 |                                                     | 10.0 ± 0.5                                        | 3.9                                                    | 62913                                                   |            |      |        |
| 2023/2/22  |               | 33.4      | 888 ± 176  | 1.2 ± 0.2  |                                                                 |                                                     | 5.9 ± 0.4                                         | 1.3                                                    | 149918                                                  |            |      |        |
| IWS        |               | 2021/6/17 | 140.9745   | 37.8048    |                                                                 |                                                     | 31.1                                              | 1985 ± 64                                              | 15.6 ± 0.5                                              | 14.8 ± 8.9 | 7.9  | 134223 |
|            |               | 2021/7/20 |            |            |                                                                 |                                                     | 29.0                                              | 898 ± 58                                               | 4.9 ± 0.3                                               | 22.6 ± 0.7 | 5.5  | 39780  |
|            | 2021/8/27     | 26.7      |            |            | 1780 ± 200                                                      | 2.2 ± 0.3                                           | 12.9 ± 0.5                                        | 1.3                                                    | 138376                                                  |            |      |        |
|            | 2021/9/24     | 29.4      |            |            | 641 ± 42                                                        | 4.4 ± 0.3                                           | 10.5 ± 0.5                                        | 6.9                                                    | 60845                                                   |            |      |        |
|            | 2021/10/28    | 27.8      |            |            | 788 ± 92                                                        | 2.2 ± 0.3                                           | 7.4 ± 0.5                                         | 2.8                                                    | 106667                                                  |            |      |        |
|            | 2021/12/24    | 30.0      |            |            | 399 ± 84                                                        | 1.0 ± 0.2                                           | 5.4 ± 0.4                                         | 2.5                                                    | 74509                                                   |            |      |        |
|            | 2022/2/8      | 32.0      |            |            | 436 ± 143                                                       | 0.5 ± 0.2                                           | 3.3 ± 0.4                                         | 1.3                                                    | 133630                                                  |            |      |        |
|            | 2022/6/23     | 28.3      |            |            | 398 ± 29                                                        | 4.1 ± 0.3                                           | 14.1 ± 0.5                                        | 10.4                                                   | 28239                                                   |            |      |        |
|            | 2022/8/30     | 27.7      |            |            | 340 ± 40                                                        | 2.1 ± 0.3                                           | 11.2 ± 0.5                                        | 6.3                                                    | 30257                                                   |            |      |        |
|            | 2022/10/27    | 33.9      |            |            | 286 ± 45                                                        | 1.2 ± 0.2                                           | 10.1 ± 0.5                                        | 4.3                                                    | 28324                                                   |            |      |        |
|            | 2023/2/22     | 33.8      |            |            | 177 ± 43                                                        | 0.4 ± 0.1                                           | 4.3 ± 0.3                                         | 2.3                                                    | 40616                                                   |            |      |        |
|            | UDE           | 2021/6/17 |            |            | 140.9742                                                        | 37.8133                                             | 32.6                                              | 751 ± 34                                               | 8.7 ± 0.4                                               | 9.5 ± 0.4  | 11.6 | 79448  |
|            |               | 2021/7/20 |            |            |                                                                 |                                                     | 30.7                                              | 440 ± 28                                               | 5.0 ± 0.3                                               | 9.4 ± 0.2  | 11.3 | 46919  |
| 2021/8/27  |               | 28.9      | 9719 ± 885 | 3.2 ± 0.3  |                                                                 |                                                     | 10.0 ± 0.3                                        | 0.3                                                    | 976626                                                  |            |      |        |
| 2021/9/24  |               | 10.4      | 751 ± 76   | 2.4 ± 0.2  |                                                                 |                                                     | 4.4 ± 0.4                                         | 3.2                                                    | 169362                                                  |            |      |        |
| 2021/10/28 |               | 15.7      | 879 ± 77   | 2.5 ± 0.2  |                                                                 |                                                     | 3.8 ± 0.4                                         | 2.9                                                    | 234156                                                  |            |      |        |
| 2021/12/24 |               | 23.7      | 648 ± 114  | 1.2 ± 0.2  |                                                                 |                                                     | 3.5 ± 0.4                                         | 1.8                                                    | 183115                                                  |            |      |        |
| 2022/2/8   |               | 27.2      | 307 ± 83   | 0.5 ± 0.1  |                                                                 |                                                     | 2.5 ± 0.3                                         | 1.5                                                    | 123684                                                  |            |      |        |
| 2022/6/23  |               | 31.9      | 595 ± 61   | 2.1 ± 0.2  |                                                                 |                                                     | 6.9 ± 0.4                                         | 3.5                                                    | 86026                                                   |            |      |        |
| 2022/8/30  |               | 19.5      | 460 ± 20   | 7.0 ± 0.3  |                                                                 |                                                     | 8.4 ± 0.4                                         | 15.2                                                   | 54988                                                   |            |      |        |
| 2022/10/27 |               | 34.6      | 471 ± 37   | 3.6 ± 0.3  |                                                                 |                                                     | 7.3 ± 0.4                                         | 7.7                                                    | 64978                                                   |            |      |        |
| 2023/2/22  |               | 27.2      | 631 ± 106  | 1.3 ± 0.2  |                                                                 |                                                     | 4.4 ± 0.3                                         | 2.1                                                    | 143594                                                  |            |      |        |

**Table S4**

Analytical results of  $^{137}\text{Cs}$  activity concentration at Station KZE, WKS, WKO and SKS in Matsukawa-ura lagoon and station URS at offshore of the lagoon.  $^{137}\text{Cs}$  activity concentrations were decay-corrected to the sampling date.

| Station    | Sampling date | Long E     | Lat N      | Salinity   | $^{137}\text{Cs}$ in suspended particles (Bq kg <sup>-1</sup> ) | Particulate $^{137}\text{Cs}$ (Bq m <sup>-3</sup> ) | Dissolved $^{137}\text{Cs}$ (Bq m <sup>-3</sup> ) | Suspended particle concentration (Bq m <sup>-3</sup> ) | Apparent distribution coefficient (L kg <sup>-1</sup> ) |            |      |       |
|------------|---------------|------------|------------|------------|-----------------------------------------------------------------|-----------------------------------------------------|---------------------------------------------------|--------------------------------------------------------|---------------------------------------------------------|------------|------|-------|
| KZE        | 2021/6/17     | 140.9617   | 37.8208    | 32.3       | 644 ± 32                                                        | 6.8 ± 0.3                                           | 20.3 ± 0.4                                        | 10.6                                                   | 31758                                                   |            |      |       |
|            | 2021/7/20     |            |            | 30.4       | 361 ± 34                                                        | 2.9 ± 0.3                                           | 11.5 ± 0.5                                        | 8.0                                                    | 31282                                                   |            |      |       |
|            | 2021/8/27     |            |            | 30.4       | 2240 ± 171                                                      | 4.3 ± 0.3                                           | 12.3 ± 0.3                                        | 1.9                                                    | 181685                                                  |            |      |       |
|            | 2021/9/24     |            |            | 29.6       | 466 ± 14                                                        | 14.5 ± 0.4                                          | 11.8 ± 0.5                                        | 31.0                                                   | 39624                                                   |            |      |       |
|            | 2021/10/28    |            |            | 30.7       | 704 ± 70                                                        | 2.5 ± 0.2                                           | 6.8 ± 0.5                                         | 3.5                                                    | 102786                                                  |            |      |       |
|            | 2021/12/24    |            |            | 30.0       | 193 ± 63                                                        | 0.4 ± 0.1                                           | 4.7 ± 0.3                                         | 2.2                                                    | 41199                                                   |            |      |       |
|            | 2022/2/8      |            |            | 32.3       | 555 ± 153                                                       | 0.8 ± 0.2                                           | 4.7 ± 0.3                                         | 1.5                                                    | 118216                                                  |            |      |       |
|            | 2022/6/23     |            |            | 27.8       | 905 ± 42                                                        | 7.5 ± 0.3                                           | 15.5 ± 0.6                                        | 8.3                                                    | 58171                                                   |            |      |       |
|            | 2022/8/30     |            |            | 29.7       | 483 ± 25                                                        | 6.5 ± 0.3                                           | 12.0 ± 0.5                                        | 13.4                                                   | 40271                                                   |            |      |       |
|            | 2022/10/27    |            |            | 34.1       | 375 ± 72                                                        | 1.4 ± 0.3                                           | 7.7 ± 0.5                                         | 3.6                                                    | 48482                                                   |            |      |       |
|            | 2023/2/22     |            |            | 33.9       | 401 ± 76                                                        | 1.1 ± 0.2                                           | 5.0 ± 0.4                                         | 2.8                                                    | 79378                                                   |            |      |       |
|            | WKS           |            |            | 2021/6/17  | 140.9807                                                        | 37.8199                                             | 29.0                                              | 160 ± 14                                               | 4.1 ± 0.3                                               | 13.4 ± 0.6 | 25.5 | 11979 |
|            |               |            |            | 2021/7/20  |                                                                 |                                                     | 31.5                                              | 171 ± 49                                               | 1.0 ± 0.3                                               | 7.5 ± 0.2  | 6.0  | 22819 |
| 2021/8/27  |               | 29.2       | 1790 ± 254 | 2.0 ± 0.3  |                                                                 |                                                     | 13.6 ± 0.4                                        | 1.1                                                    | 131290                                                  |            |      |       |
| 2021/9/24  |               | 29.6       | 583 ± 54   | 3.4 ± 0.3  |                                                                 |                                                     | 10.9 ± 0.5                                        | 5.8                                                    | 53455                                                   |            |      |       |
| 2021/10/28 |               | 31.4       | 1086 ± 106 | 3.3 ± 0.3  |                                                                 |                                                     | 6.2 ± 0.5                                         | 3.0                                                    | 175107                                                  |            |      |       |
| 2021/12/24 |               | 29.6       | 557 ± 165  | 0.7 ± 0.2  |                                                                 |                                                     | 5.6 ± 0.4                                         | 1.3                                                    | 100232                                                  |            |      |       |
| 2022/2/8   |               | 32.3       | 347 ± 107  | 0.5 ± 0.1  |                                                                 |                                                     | 4.9 ± 0.3                                         | 1.3                                                    | 71415                                                   |            |      |       |
| 2022/6/23  |               | 31.8       | 404 ± 58   | 0.8 ± 0.1  |                                                                 |                                                     | 8.4 ± 0.5                                         | 1.9                                                    | 48078                                                   |            |      |       |
| 2022/8/30  |               | 26.1       | 407 ± 65   | 1.5 ± 0.2  |                                                                 |                                                     | 11.1 ± 0.5                                        | 3.7                                                    | 36777                                                   |            |      |       |
| 2022/10/27 |               | 34.2       | 9604 ± 261 | 15.4 ± 0.4 |                                                                 |                                                     | 7.9 ± 0.5                                         | 1.6                                                    | 1209155                                                 |            |      |       |
| 2023/2/20  |               | 34.6       | 204 ± 29   | 0.2 ± 0.0  |                                                                 |                                                     | 3.5 ± 0.4                                         | 1.0                                                    | 57484                                                   |            |      |       |
| WKO        |               | 2021/6/17  | 140.9756   | 37.8219    |                                                                 |                                                     | 31.4                                              | 699 ± 71                                               | 2.3 ± 0.2                                               | 7.2 ± 0.2  | 3.3  | 96859 |
|            |               | 2021/7/20  |            |            |                                                                 |                                                     | 31.3                                              | 287 ± 20                                               | 4.0 ± 0.3                                               | 6.5 ± 0.2  | 13.8 | 44141 |
|            | 2021/8/27     | 30.0       |            |            | 553 ± 77                                                        | 1.8 ± 0.2                                           | 8.0 ± 0.3                                         | 3.2                                                    | 68885                                                   |            |      |       |
|            | 2021/9/24     | 29.6       |            |            | 1097 ± 102                                                      | 2.3 ± 0.2                                           | 10.4 ± 0.5                                        | 2.1                                                    | 105583                                                  |            |      |       |
|            | 2021/10/28    | 30.9       |            |            | 1202 ± 192                                                      | 1.6 ± 0.2                                           | 6.8 ± 0.5                                         | 1.3                                                    | 176470                                                  |            |      |       |
|            | 2021/12/24    | 30.2       |            |            | 1007 ± 218                                                      | 1.1 ± 0.2                                           | 5.1 ± 0.4                                         | 1.1                                                    | 199352                                                  |            |      |       |
|            | 2022/2/8      | 32.9       |            |            | 100 ± 29                                                        | 0.1 ± 0.0                                           | 2.9 ± 0.3                                         | 1.5                                                    | 34702                                                   |            |      |       |
|            | 2022/6/23     | 32.0       |            |            | 590 ± 106                                                       | 1.3 ± 0.2                                           | 5.6 ± 0.4                                         | 2.2                                                    | 106005                                                  |            |      |       |
|            | 2022/8/30     | 29.8       |            |            | 871 ± 157                                                       | 1.2 ± 0.2                                           | 7.6 ± 0.5                                         | 1.4                                                    | 114686                                                  |            |      |       |
|            | 2022/10/27    | 33.3       |            |            | 1044 ± 81                                                       | 3.8 ± 0.3                                           | 7.1 ± 0.4                                         | 3.7                                                    | 146499                                                  |            |      |       |
|            | 2023/2/22     | 34.4       |            |            | 765 ± 220                                                       | 0.4 ± 0.1                                           | 4.1 ± 0.4                                         | 0.6                                                    | 185232                                                  |            |      |       |
|            | SKS           | 2021/6/17  |            |            | 140.9774                                                        | 37.8277                                             | 31.4                                              | 190 ± 42                                               | 0.9 ± 0.2                                               | 7.6 ± 0.6  | 4.5  | 25102 |
|            |               | 2021/7/20  |            |            |                                                                 |                                                     | 29.6                                              | 199 ± 35                                               | 0.9 ± 0.2                                               | 14.2 ± 0.3 | 4.7  | 14047 |
| 2021/8/27  |               | 30.0       | 2024 ± 263 | 1.7 ± 0.2  |                                                                 |                                                     | 7.9 ± 0.4                                         | 0.9                                                    | 255302                                                  |            |      |       |
| 2021/9/24  |               | 29.0       | 208 ± 44   | 0.4 ± 0.1  |                                                                 |                                                     | 7.1 ± 0.4                                         | 2.1                                                    | 29456                                                   |            |      |       |
| 2021/10/28 |               | 28.7       | 631 ± 160  | 0.9 ± 0.2  |                                                                 |                                                     | 7.2 ± 0.5                                         | 1.4                                                    | 87242                                                   |            |      |       |
| 2021/12/24 |               | 29.4       | 387 ± 98   | 0.6 ± 0.2  |                                                                 |                                                     | 6.8 ± 0.5                                         | 1.6                                                    | 57160                                                   |            |      |       |
| 2022/2/8   |               | 32.3       | 522 ± 127  | 0.9 ± 0.2  |                                                                 |                                                     | 4.0 ± 0.4                                         | 1.7                                                    | 130624                                                  |            |      |       |
| 2022/6/23  |               | 30.1       | 749 ± 102  | 1.8 ± 0.2  |                                                                 |                                                     | 9.4 ± 0.5                                         | 2.5                                                    | 80067                                                   |            |      |       |
| 2022/8/30  |               | 29.3       | 148 ± 37   | 0.2 ± 0.1  |                                                                 |                                                     | 6.2 ± 0.4                                         | 1.6                                                    | 23764                                                   |            |      |       |
| 2022/10/27 |               | 34.1       | 551 ± 62   | 2.3 ± 0.3  |                                                                 |                                                     | 9.0 ± 0.4                                         | 4.3                                                    | 61196                                                   |            |      |       |
| 2023/2/22  |               | 33.7       | 1256 ± 329 | 0.9 ± 0.2  |                                                                 |                                                     | 4.4 ± 0.4                                         | 0.7                                                    | 286949                                                  |            |      |       |
| URS        |               | 2021/8/2   | 141.0039   | 37.8000    |                                                                 |                                                     | 32.0                                              | ND                                                     | ND                                                      | 3.1 ± 0.2  | 3.0  | -     |
|            |               | 2021/10/14 |            |            |                                                                 |                                                     | 30.5                                              | 167 ± 53                                               | 0.2 ± 0.1                                               | 4.8 ± 0.4  | 1.0  | 34840 |
|            | 2022/2/1      | 34.4       |            |            | 403 ± 76                                                        | 0.4 ± 0.1                                           | 3.1 ± 0.4                                         | 1.0                                                    | 131808                                                  |            |      |       |
|            | 2022/6/1      | 33.7       |            |            | 122 ± 28                                                        | 0.4 ± 0.1                                           | 2.8 ± 0.3                                         | 3.2                                                    | 43007                                                   |            |      |       |
|            | 2022/8/3      | 32.7       |            |            | ND                                                              | ND                                                  | 2.7 ± 0.3                                         | 0.8                                                    | -                                                       |            |      |       |
|            | 2022/10/3     | 33.4       |            |            | 247 ± 61                                                        | 0.8 ± 0.2                                           | 2.5 ± 0.3                                         | 3.2                                                    | 98023                                                   |            |      |       |
|            | 2023/2/7      | 34.3       |            |            | 175 ± 48                                                        | 0.2 ± 0.1                                           | 2.2 ± 0.3                                         | 1.2                                                    | 77673                                                   |            |      |       |

Table S5

Estimated input and output fluxes of dissolved  $^{137}\text{Cs}$  in Matsukawa-ura Lagoon.

|  | Time after the accident | Water volume in the lagoon | Input of river water              | Input of ground water             | Input of seawater                 | Exchange volume <sup>a</sup>      | Dissolved $^{137}\text{Cs}$ in coastal water (station URS) | Weighted mean dissolved $^{137}\text{Cs}$ in the lagoon | potential flux of dissolved $^{137}\text{Cs}$ | Flux of riverine dissolved $^{137}\text{Cs}$ | Desorbable fraction of riverine particulate $^{137}\text{Cs}$ <sup>b</sup> | Flux of dissolved $^{137}\text{Cs}$ from the lagoon bottom | Flux of dissolved $^{137}\text{Cs}$ exporting to the Pacific Ocean |    |
|--|-------------------------|----------------------------|-----------------------------------|-----------------------------------|-----------------------------------|-----------------------------------|------------------------------------------------------------|---------------------------------------------------------|-----------------------------------------------|----------------------------------------------|----------------------------------------------------------------------------|------------------------------------------------------------|--------------------------------------------------------------------|----|
|  | day                     | Mm <sup>3</sup>            | Mm <sup>3</sup> 12h <sup>-1</sup> | Bq m <sup>-3</sup>                                         | Bq m <sup>-3</sup>                                      | MBq 12 h <sup>-1</sup>                        | MBq 12 h <sup>-1</sup>                       | MBq 12 h <sup>-1</sup>                                                     | MBq 12 h <sup>-1</sup>                                     | MBq 12 h <sup>-1</sup>                                             |    |
|  | Jun-21                  | 3751                       | 8.0                               | 0.11                              | 0.0079                            | 7.9                               | 4.0                                                        | 2.2 - 4.8                                               | 17                                            | 48 - 59                                      | 0.27                                                                       | 0.036                                                      | 48 - 58                                                            | 67 |
|  | Jul-21                  | 3784                       | 8.0                               | 0.24                              | 0.018                             | 7.8                               | 3.9                                                        | 2.2 - 4.8                                               | 19                                            | 55 - 65                                      | 0.61                                                                       | 0.060                                                      | 55 - 65                                                            | 74 |
|  | Aug-21                  | 3822                       | 8.0                               | 0.44                              | 0.033                             | 7.6                               | 3.8                                                        | 2.2 - 4.8                                               | 13                                            | 31 - 41                                      | 1.2                                                                        | 0.077                                                      | 30 - 40                                                            | 49 |
|  | Sep-21                  | 3850                       | 8.0                               | 0.26                              | 0.020                             | 7.8                               | 3.9                                                        | 2.2 - 4.8                                               | 13                                            | 34 - 44                                      | 0.57                                                                       | 0.078                                                      | 33 - 43                                                            | 52 |
|  | Oct-21                  | 3884                       | 8.0                               | 0.23                              | 0.018                             | 7.8                               | 3.9                                                        | 2.2 - 4.8                                               | 8.5                                           | 14 - 24                                      | 0.38                                                                       | 0.086                                                      | 14 - 24                                                            | 33 |
|  | Dec-21                  | 3941                       | 8.0                               | 0.11                              | 0.0084                            | 7.9                               | 4.0                                                        | 2.2 - 4.8                                               | 5.4                                           | 2.6 - 13                                     | 0.25                                                                       | 0.021                                                      | 2.3 - 13                                                           | 22 |
|  | Feb-22                  | 3987                       | 8.0                               | 0.020                             | 0.0015                            | 8.0                               | 4.0                                                        | 2.2 - 4.8                                               | 5.3                                           | 1.9 - 12                                     | 0.03                                                                       | 0.0031                                                     | 1.8 - 12                                                           | 21 |
|  | Jun-22                  | 4122                       | 8.0                               | 0.30                              | 0.022                             | 7.7                               | 3.9                                                        | 2.2 - 4.8                                               | 15                                            | 40 - 50                                      | 0.64                                                                       | 0.053                                                      | 39 - 49                                                            | 58 |
|  | Aug-22                  | 4190                       | 8.0                               | 0.15                              | 0.011                             | 7.9                               | 3.9                                                        | 2.2 - 4.8                                               | 11                                            | 24 - 34                                      | 0.23                                                                       | 0.40                                                       | 24 - 34                                                            | 43 |
|  | Oct-22                  | 4248                       | 8.0                               | 0.10                              | 0.0078                            | 7.9                               | 4.0                                                        | 2.2 - 4.8                                               | 11                                            | 23 - 33                                      | 0.20                                                                       | 0.010                                                      | 23 - 33                                                            | 42 |
|  | Feb-23                  | 4366                       | 8.0                               | 0.047                             | 0.0035                            | 8.0                               | 4.0                                                        | 2.2 - 4.8                                               | 5.5                                           | 2.7 - 13                                     | 0.076                                                                      | 0.0052                                                     | 2.6 - 13                                                           | 22 |

<sup>a</sup> The maximum exchange volume in Matsukawa-ura lagoon assumed 50% during each tidal cycle under spring tide conditions (Kohata et al., 2003).

<sup>b</sup> Assumed that 5.5% of riverine particulate  $^{137}\text{Cs}$  were desorbed as dissolved  $^{137}\text{Cs}$  (Takata et al., 2021)

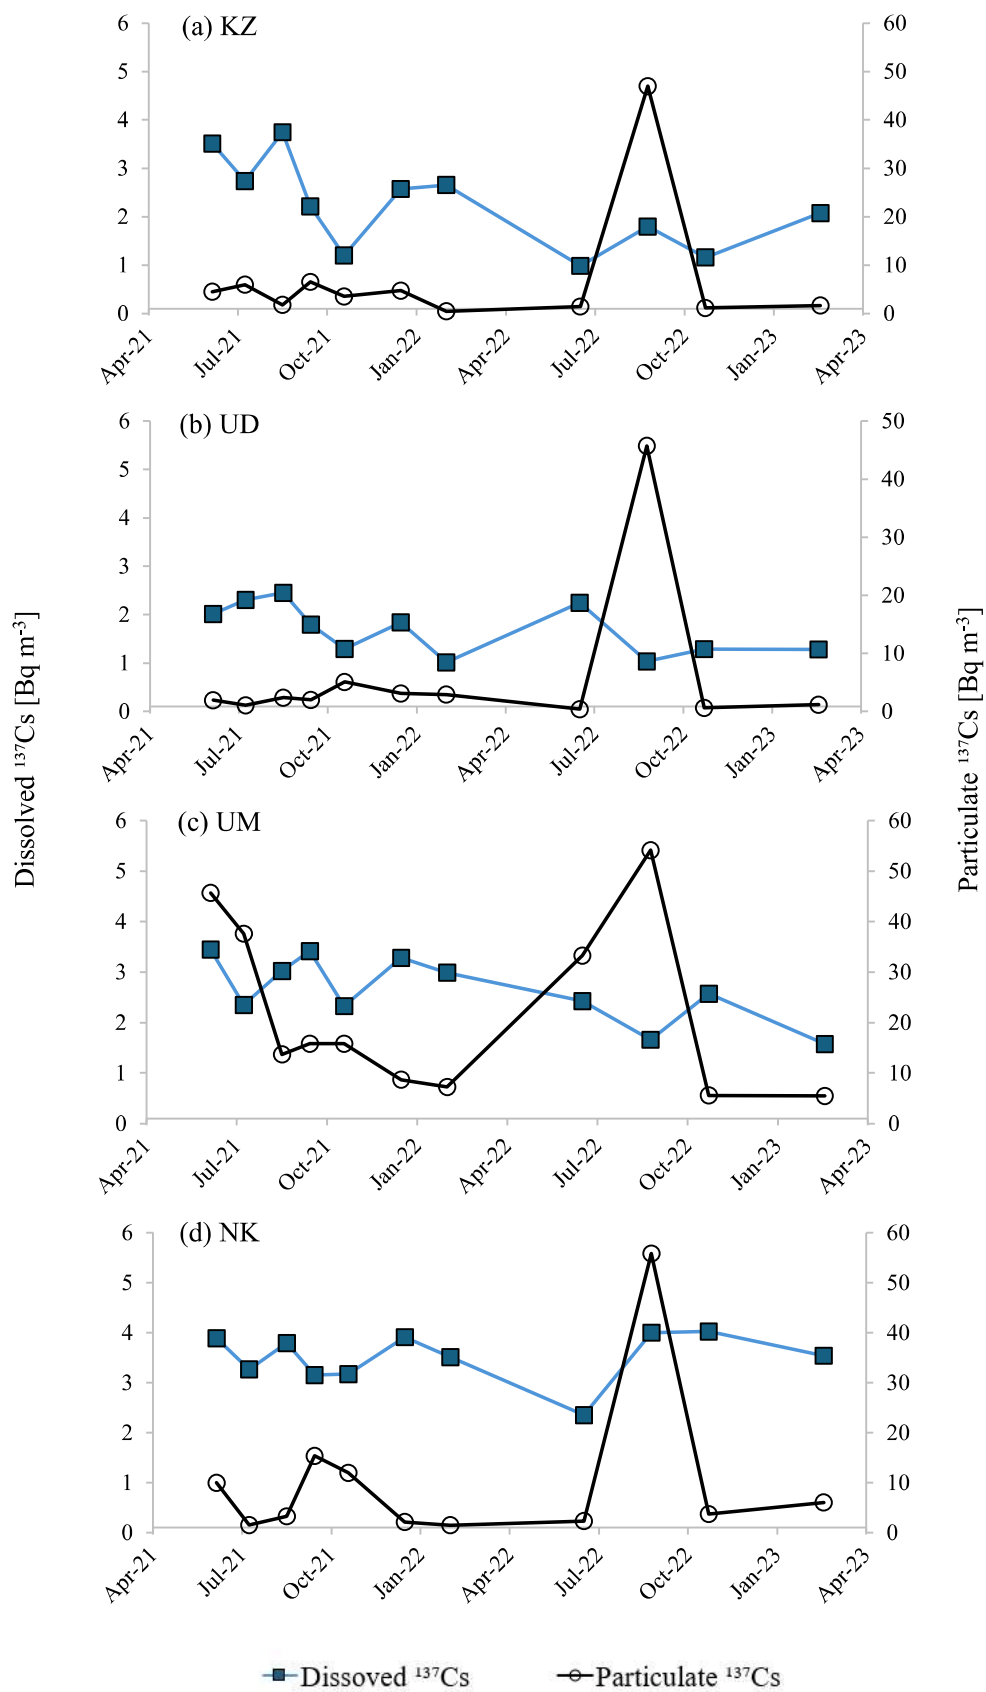

**Figure S1:** Time series of dissolve  $^{137}\text{Cs}$  and particulate  $^{137}\text{Cs}$  concentration in Matsukawa-ura lagoon and station URS at offshore of the lagoon.  $^{137}\text{Cs}$  concentrations were decay-corrected to the sampling date.

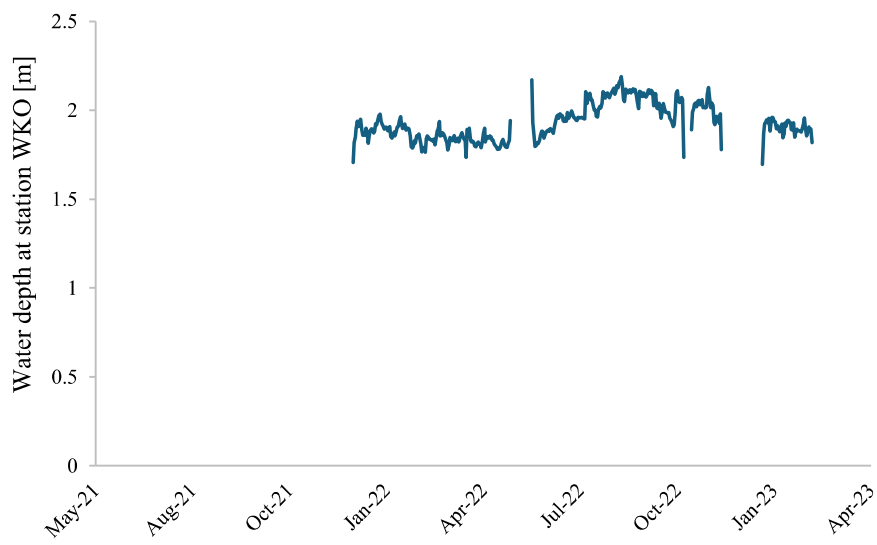

**Figure S2: Time series of water depth at Station WKO from December 29, 2021.**
